# Supplementary material
Source: publisher figshare collection journal article supplement (https://frontiersin.figshare.com/ndownloader/files/13012385)
Supplement: Supplementary file 1 [file 13012385]

Supplementary Material

**Bottlenose Dolphins and Antillean Manatees Respond to Small Multi-Rotor Unmanned Aerial Systems**

**Eric A. Ramos*, Brigid Maloney, Marcelo O. Magnasco, Diana Reiss**

*** Correspondence:** Eric A. Ramos: eric.angel.ramos@gmail.com

**Supplementary Video 1.** Examples of bottlenose dolphins reacting to a small multi-rotor unmanned aerial system. Clip 1: An adult female dolphin exhibiting side-roll behavior. Clip 2: An adult male dolphin completing a full-roll. Clip 3: An adult dolphin engaged in spin-and-orient behavior in a group. Clip 4: A sub-adult male dolphin reacting with a series of behaviors.

**Supplementary Video 2.** Examples of Antillean manatees reacting to a small multi-rotor unmanned aerial system at 8 X playback speed. Clip 1: A single adult manatee fleeing following its response to the aircraft. Clip 2: The response of one manatee causes several others to flee into a nearby channel. Clip 3: A lone manatee directionally evades the aircraft following exposure to multiple overhead movements of the aircraft.
